# Supplementary material
Source: PubMed Central journal article supplement (PMC4575538)
Supplement: Supp_Table1.pdf [file Supp_Table1.pdf]

## Supplementary Data

SUPPLEMENTARY TABLE S1. TOBIT REGRESSION  
MODELS FOR PLASMA NVP LEVELS

|                                                   | <i>Estimate</i> | <i>Std. Error</i> | <i>P value</i> |
|---------------------------------------------------|-----------------|-------------------|----------------|
| (Intercept)                                       | 5.514           | 2.636             | 0.036429       |
| <i>T983C T/C</i>                                  | 3.778           | 1.103             | 0.000615       |
| <i>G516T G/T</i>                                  | 1.902           | 0.965             | 0.048714       |
| <i>G516T T/T</i>                                  | 5.023           | 1.173             | 1.86e-05       |
| <i>C163A A/A</i>                                  | 1.254           | 1.048             | 0.231591       |
| <i>C163A C/A</i>                                  | -1.384          | 0.963             | 0.150919       |
| Gender: female                                    | 0.178           | 1.100             | 0.871253       |
| Age                                               | 0.080           | 0.041             | 0.049104       |
| BMI                                               | -0.059          | 0.088             | 0.498873       |
| Log (scale)                                       | 1.391           | 0.069             | <2e-16         |
| <i>Removing C163A as a covariate</i>              |                 |                   |                |
| (Intercept)                                       | 4.777           | 2.615             | 0.067807       |
| <i>T983C T/C</i>                                  | 3.829           | 1.081             | 0.000397       |
| <i>G516T G/T</i>                                  | 2.152           | 0.961             | 0.025125       |
| <i>G516T T/T</i>                                  | 5.208           | 1.168             | 8.23e-06       |
| Gender: female                                    | -0.140          | 1.089             | 0.897744       |
| Age                                               | 0.067           | 0.040             | 0.097304       |
| BMI                                               | -0.041          | 0.088             | 0.639522       |
| Log(scale)                                        | 1.402           | 0.069             | <2e-16         |
| <i>Removing control variates (BMI and gender)</i> |                 |                   |                |
| (Intercept)                                       | 3.699           | 1.748             | 0.03431        |
| <i>T983C T/C</i>                                  | 3.845           | 1.082             | 0.00038        |
| <i>G516T G/T</i>                                  | 2.177           | 0.949             | 0.02183        |
| <i>G516T T/T</i>                                  | 5.235           | 1.167             | 7.29e-06       |
| Age                                               | 0.065           | 0.039             | 0.09171        |
| Log (scale)                                       | 1.403           | 0.069             | <2e-16         |
| <i>Removing age as a covariate</i>                |                 |                   |                |
| (Intercept)                                       | 6.293           | 0.840             | 6.66e-14       |
| <i>T983C T/C</i>                                  | 3.723           | 1.094             | 0.000664       |
| <i>G516T G/T</i>                                  | 2.320           | 0.958             | 0.015449       |
| <i>G516T T/T</i>                                  | 5.306           | 1.182             | 7.15e-06       |
| Log (scale)                                       | 1.416           | 0.069             | <2e-16         |

BMI, body mass index; MSHS, months since HAART start.
