# Supplementary material
Source: PubMed Central journal article supplement (PMC4575538)
Supplement: Supp_Table2.pdf [file Supp_Table2.pdf]

SUPPLEMENTARY TABLE S2. REGRESSION MODELS  
FOR THE LOGARITHM OF CD4 CELL COUNT  
AT TIME OF COLLECTION

|                                                     | <i>Estimate</i> | <i>Std. Error</i> | <i>P value</i> |
|-----------------------------------------------------|-----------------|-------------------|----------------|
| <i>T983C T/C</i>                                    | 0.027           | 0.132             | 0.838403       |
| <i>G516T G/T</i>                                    | -0.080          | 0.114             | 0.482550       |
| <i>G516T T/T</i>                                    | 0.183           | 0.138             | 0.189869       |
| <i>C163A A/A</i>                                    | -0.327          | 0.128             | 0.012297       |
| <i>C163A C/A</i>                                    | -0.241          | 0.120             | 0.046759       |
| MSHS                                                | 0.005           | 0.001             | 0.000288       |
| Gender: female                                      | 0.218           | 0.137             | 0.114279       |
| Age                                                 | -0.009          | 0.005             | 0.073246       |
| BMI                                                 | 0.014           | 0.010             | 0.189818       |
| <i>Removing unnecessary genotypes as covariates</i> |                 |                   |                |
| (Intercept)                                         | 5.805           | 0.293             | <2e-16         |
| <i>C163A A/A</i>                                    | -0.276          | 0.126             | 0.030939       |
| <i>C163A C/A</i>                                    | -0.227          | 0.118             | 0.057620       |
| MSHS                                                | 0.005           | 0.001             | 0.000518       |
| Gender: female                                      | 0.266           | 0.136             | 0.052984       |
| Age                                                 | -0.008          | 0.005             | 0.077698       |
| BMI                                                 | 0.011           | 0.010             | 0.285641       |
| <i>Removing BMI as a covariate</i>                  |                 |                   |                |
| (Intercept)                                         | 5.999           | 0.231             | <2e-16         |
| <i>C163A A/A</i>                                    | -0.291          | 0.123             | 0.019940       |
| <i>C163A C/A</i>                                    | -0.233          | 0.114             | 0.043537       |
| MSHS                                                | 0.005           | 0.001             | 0.000669       |
| Gender: female                                      | 0.320           | 0.127             | 0.013367       |
| Age                                                 | -0.007          | 0.004             | 0.114236       |
| <i>Removing BMI and Age as covariates</i>           |                 |                   |                |
| <i>C163A A/A</i>                                    | -0.309          | 0.123             | 0.01398        |
| <i>C163A C/A</i>                                    | -0.253          | 0.114             | 0.02902        |
| MSHS                                                | 0.005           | 0.001             | 0.00113        |
| Gender: female                                      | 0.353           | 0.126             | 0.00619        |

BMI, body mass index; MSHS, months since HAART start.
