# Supplementary material
Source: PubMed Central journal article supplement (PMC4575538)
Supplement: Supp_Table3.pdf [file Supp_Table3.pdf]

SUPPLEMENTARY TABLE S3. REGRESSION MODEL  
FOR ALT EXPRESSION (LOG-LOG TRANSFORMED)

| <i>Effect of genotype<br/>on ALT</i> | <i>Coefficients</i> |                   |                |
|--------------------------------------|---------------------|-------------------|----------------|
|                                      | <i>Estimate</i>     | <i>Std. Error</i> | <i>P value</i> |
| (Intercept)                          | 1.203               | 0.114             | <2e-16         |
| <i>T983C T/C</i>                     | -0.035              | 0.049             | 0.483          |
| <i>G516T G/T</i>                     | 0.054               | 0.043             | 0.216          |
| <i>G516T T/T</i>                     | 0.056               | 0.051             | 0.281          |
| <i>C163A A/A</i>                     | -0.030              | 0.047             | 0.524          |
| <i>C163A C/A</i>                     | 0.001               | 0.044             | 0.988          |
| MSHS                                 | 0.0003              | 0.001             | 0.533          |
| Gender: female                       | -0.053              | 0.051             | 0.298          |
| Age                                  | -0.001              | 0.002             | 0.698          |
| BMI                                  | -0.002              | 0.004             | 0.638          |

BMI, body mass index; MSHS, months since HAART start.
